# Supplementary material for: Diversification in the HIV-1 Envelope Hyper-variable Domains V2, V4, and V5 and Higher Probability of Transmitted/Founder Envelope Glycosylation Favor the Development of Heterologous Neutralization Breadth
Source: PubMed Central journal article supplement (PMC5112890; doi:10.1371/journal.ppat.1005989), 2016-11-16
Supplement: ppat.1005989.s003.pdf [file ppat.1005989.s003.pdf]

**A****R53F**

Mismatches compared to master

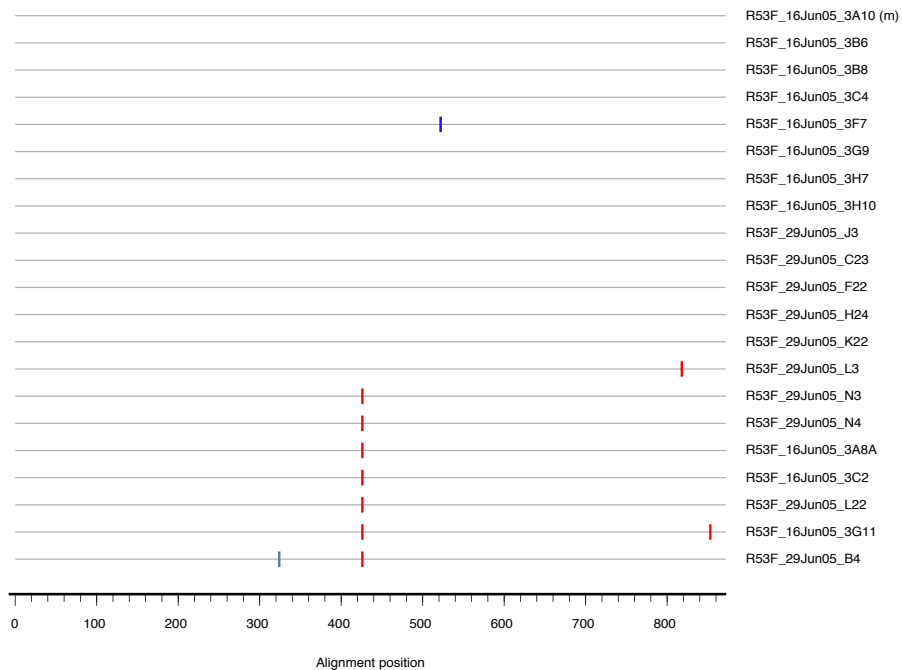**Z1800M**

Mismatches compared to master

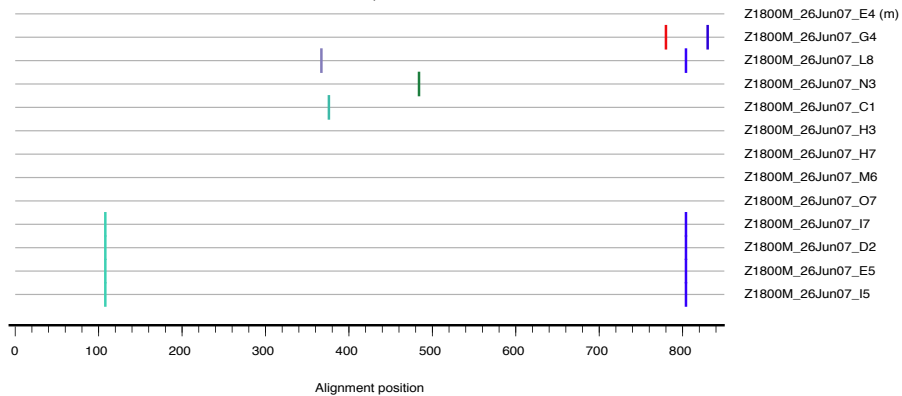**R66M**

Mismatches compared to master

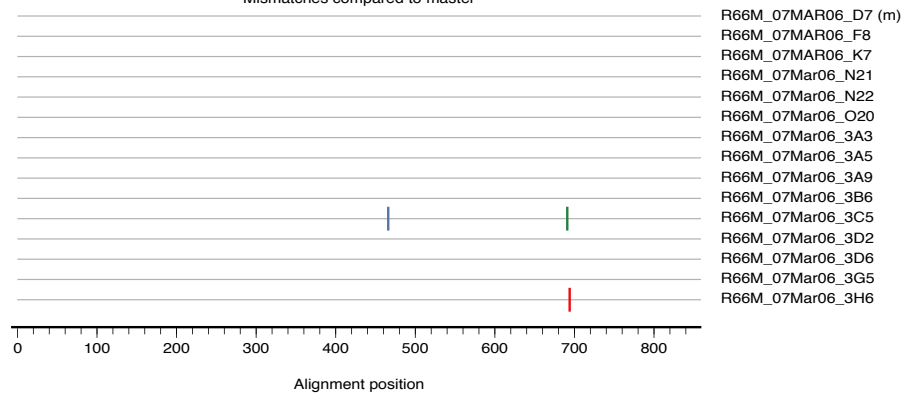**R1141M**

Mismatches compared to master

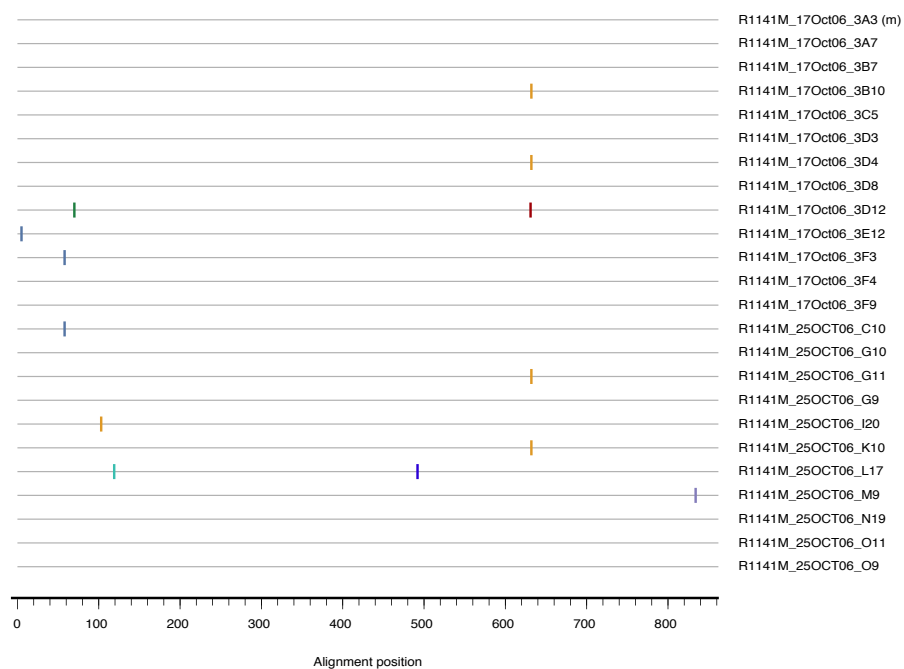

**B****R1142F**

Mismatches compared to master

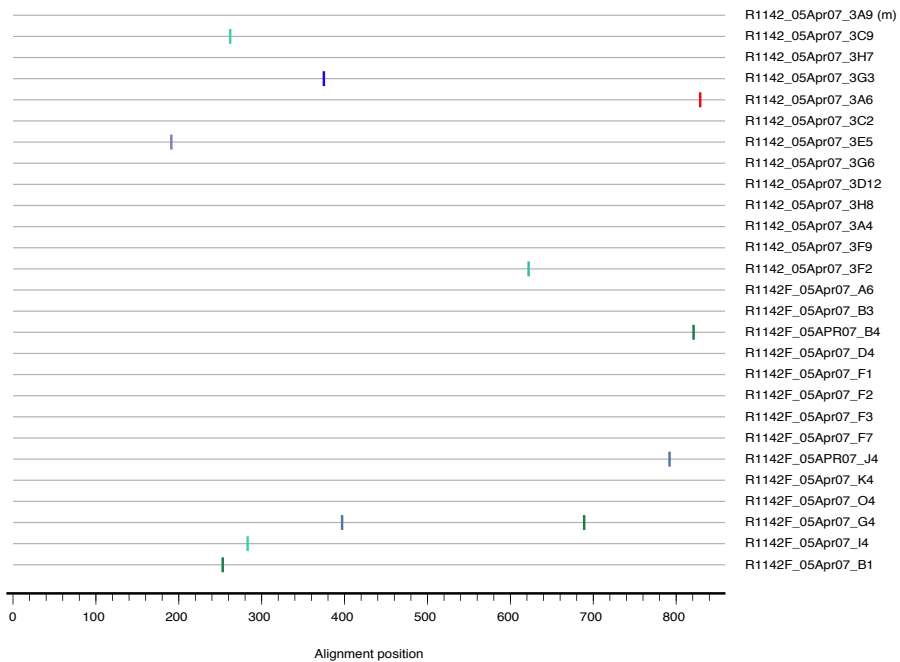**Z1022M**

Mismatches compared to master

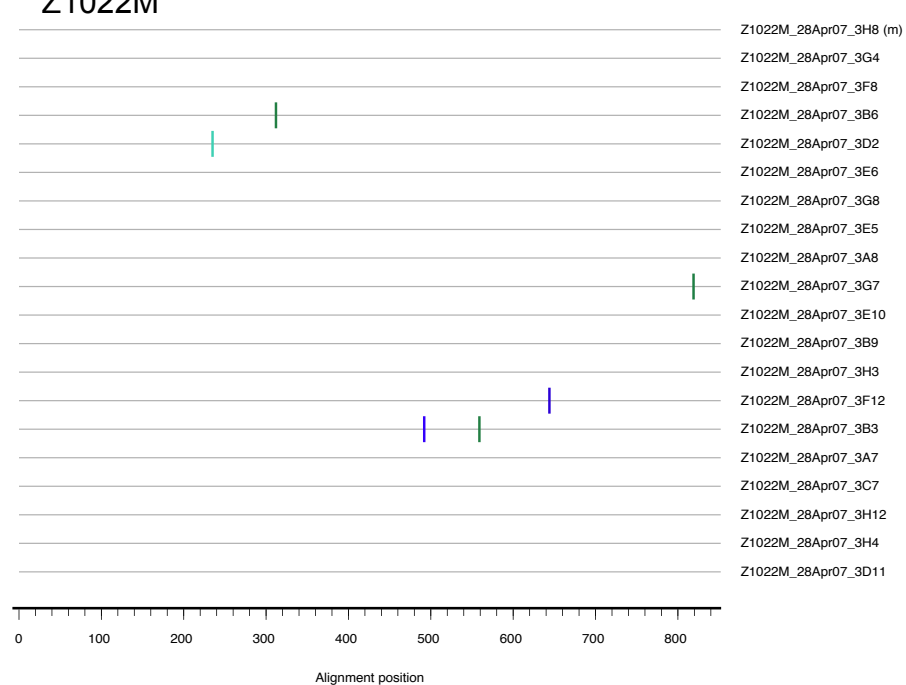**Z1023M**

Mismatches compared to master

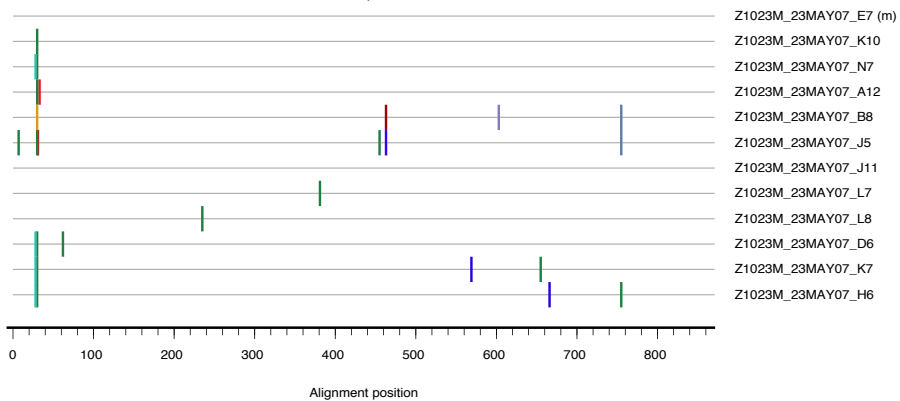**R774F**

Mismatches compared to master

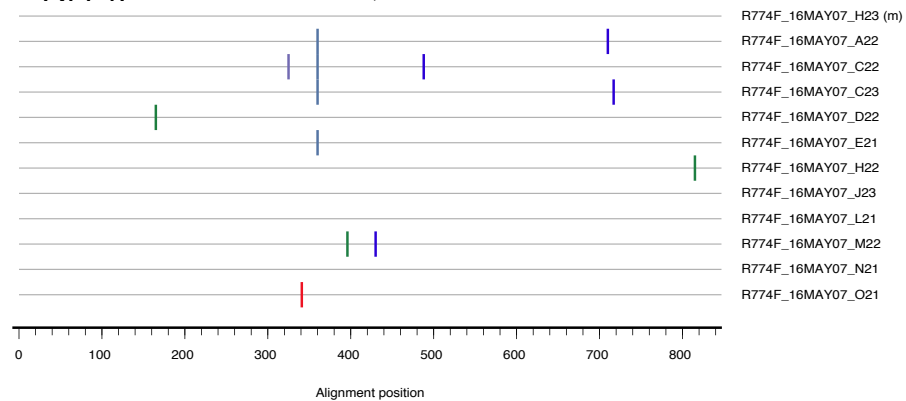

**C****R880F**

Mismatches compared to master

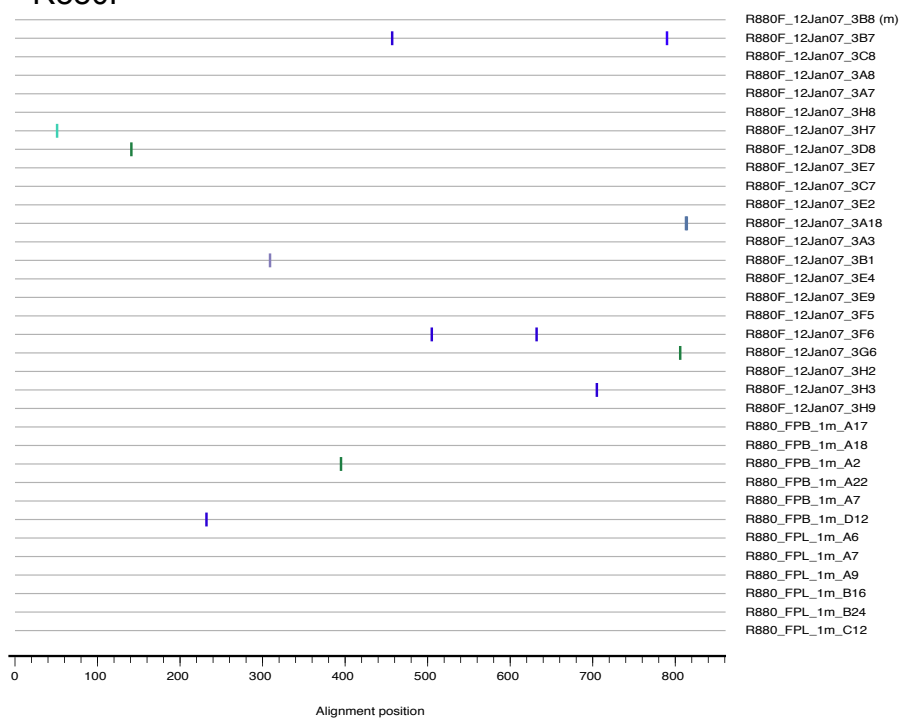**R283F**

Mismatches compared to master

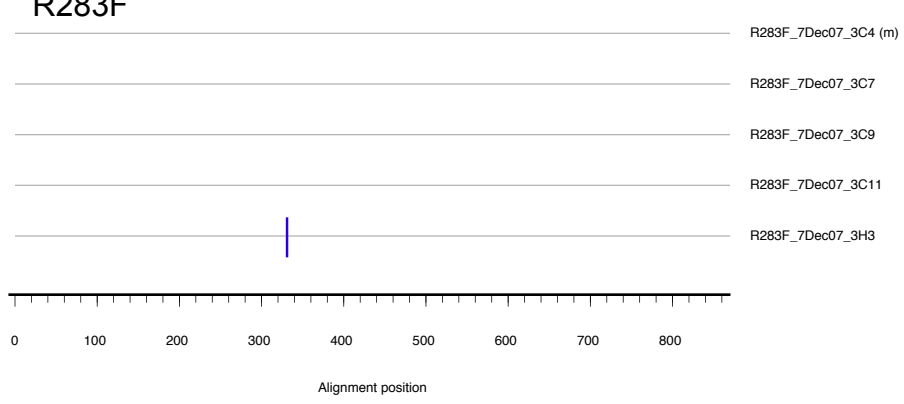**Z1024F**

Mismatches compared to master

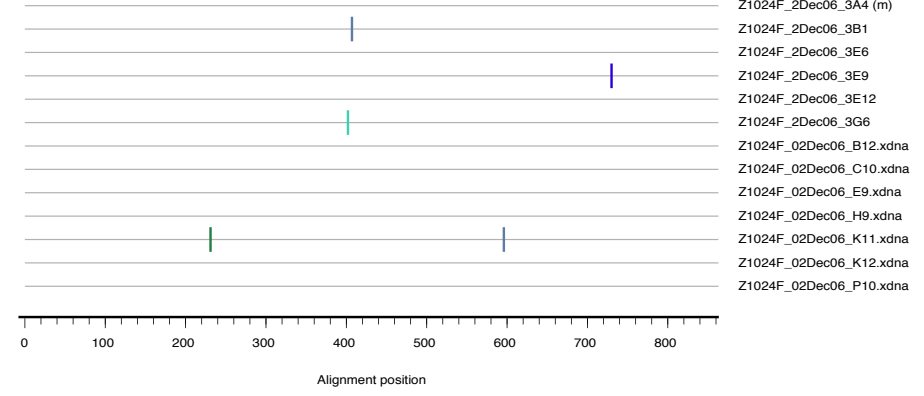**Z1792M**

Mismatches compared to master

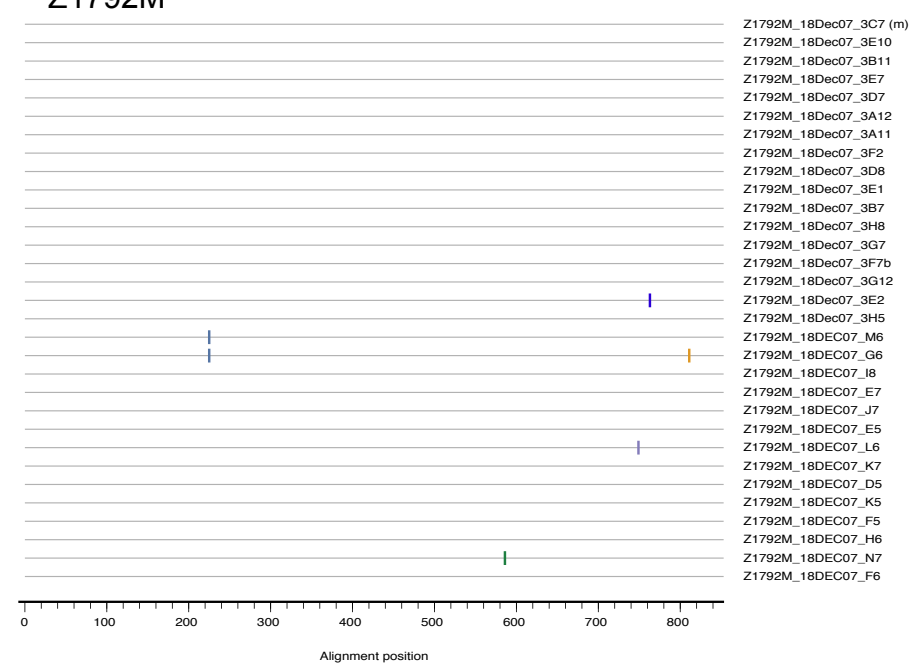

**D****Z1781M**

Mismatches compared to master

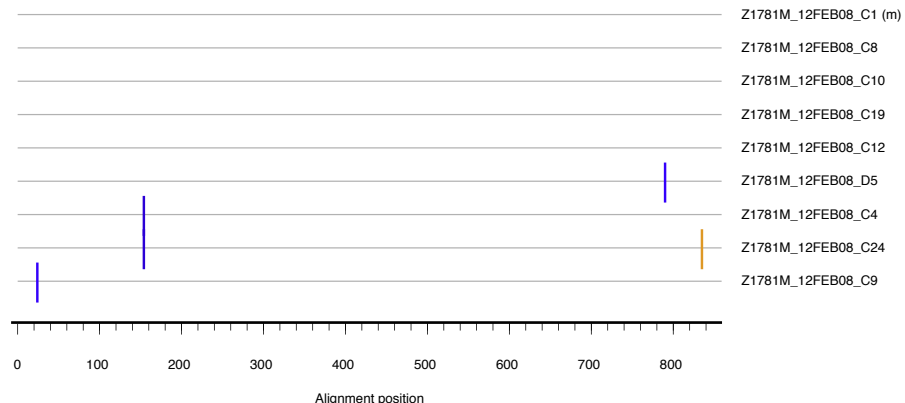**Z1047M**

Mismatches compared to master

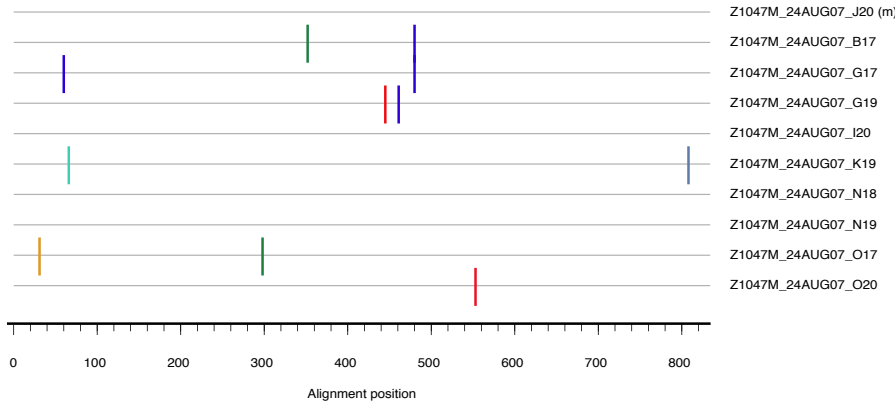**R463F**

Mismatches compared to master

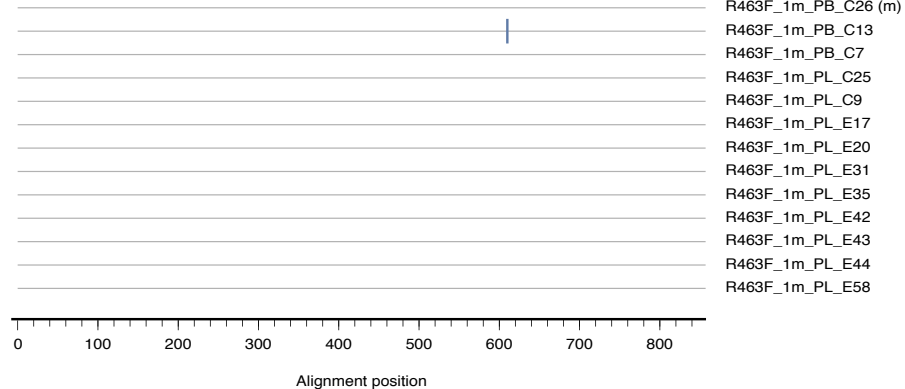**R1135M**

Mismatches compared to master

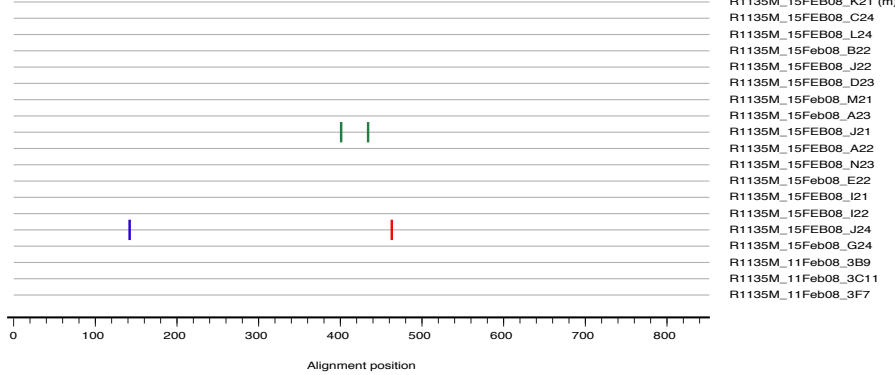

**E****Z205F**

Mismatches compared to master

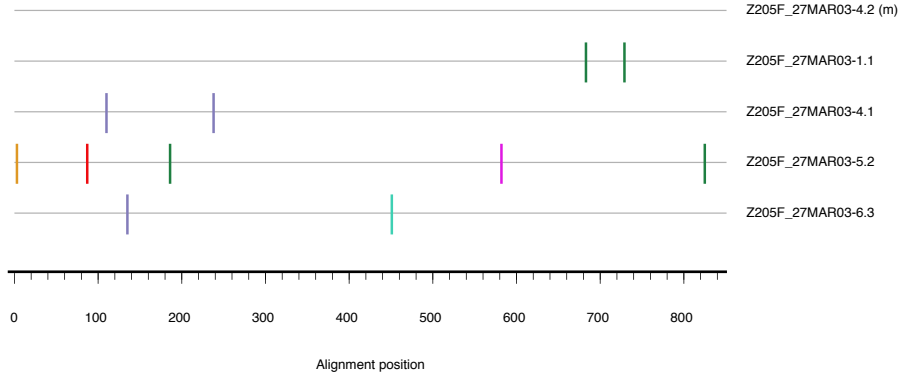**Z221M**

Mismatches compared to master

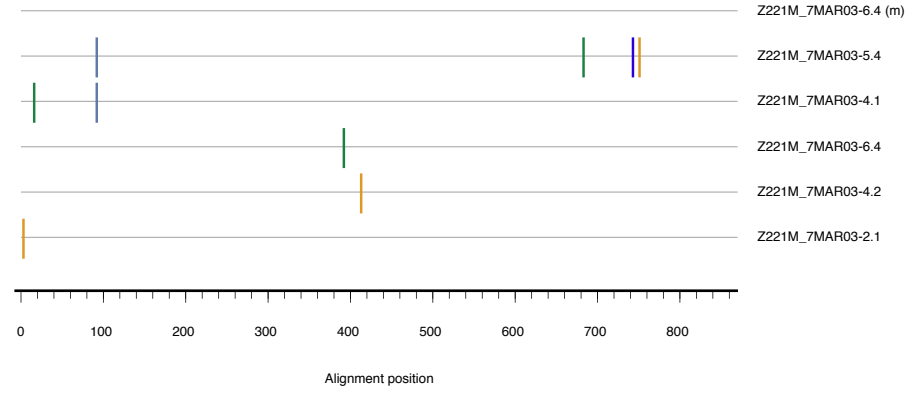**Z201M**

Mismatches compared to master

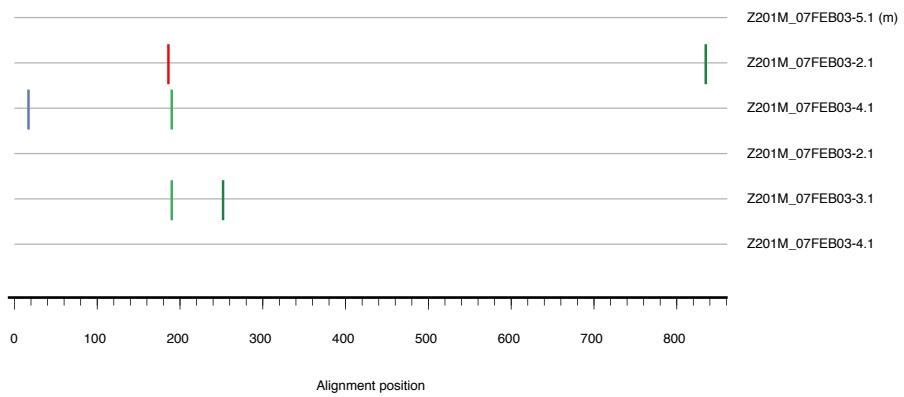**Z185F**

Mismatches compared to master

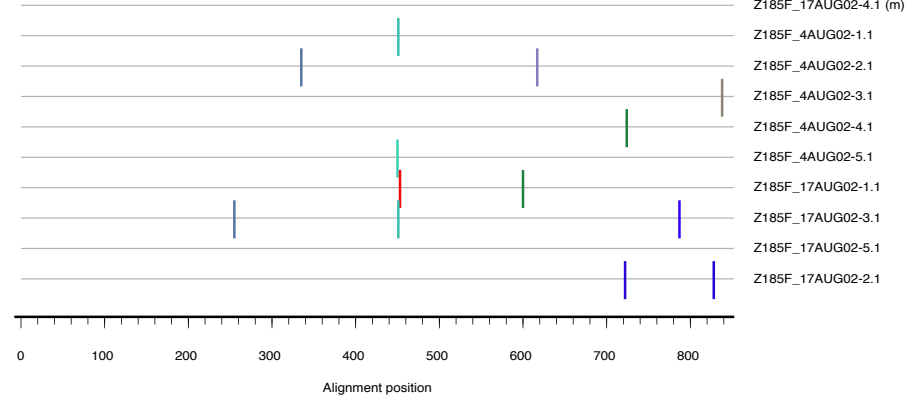**Z153M**

Mismatches compared to master

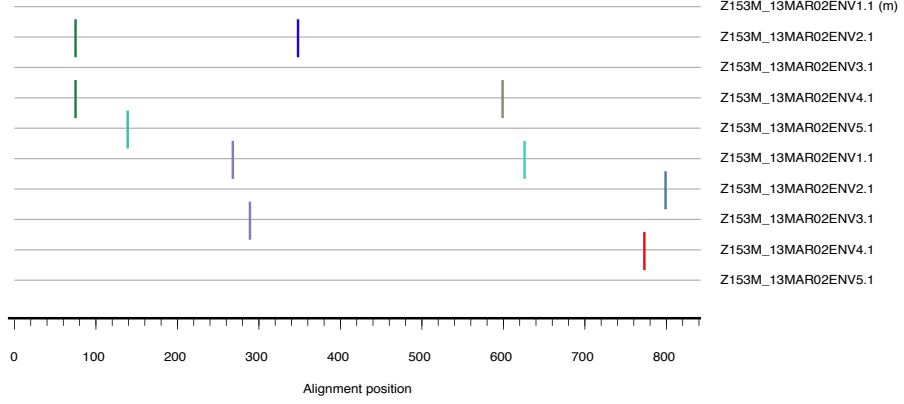**Legend**

- Ala(A) Cys(C) Asp(D) Glu(E) Phe(F) Gly(G) His(H) Ile(I) Lys(K) Leu(L)
- Met(M) Asn(N) Pro(P) Gln(Q) Arg(R) Ser(S) Thr(T) Val(V) Trp(W) Tyr(Y)
- Gap Other
