# Supplementary material for: Diversification in the HIV-1 Envelope Hyper-variable Domains V2, V4, and V5 and Higher Probability of Transmitted/Founder Envelope Glycosylation Favor the Development of Heterologous Neutralization Breadth
Source: PubMed Central journal article supplement (PMC5112890; doi:10.1371/journal.ppat.1005989), 2016-11-16
Supplement: ppat.1005989.s006.pdf [file ppat.1005989.s006.pdf]

# B. R66M

|                  | V1         | V2         | V3         |
|------------------|------------|------------|------------|
| R66M_07MAR06_D7  | NRVMTQKNC  | RPWNINGILG | PMMLMICNTR |
| R66M_07MAR06_D8  | EDLWTVVYG  | VFWDAEAT   | LFCASDAKAY |
| R66M_07MAR06_D9  | ETEVRWVAT  | HACVPTDPM  | QETLENVTE  |
| R66M_07MAR06_N21 | NFNWKGHW   | DGMHQDISL  | WQSLKPCVK  |
| R66M_07MAR06_N22 | LTPLCVTLIC | SNANVNAV   | TKTDNDIIM  |
| R66M_07MAR06_020 | KEIKICSPN  | VITELDKRR  | RVHALFYRLD |
| R66M_07MAR06_3A3 | LVPLNRSNN  | STEYLINCN  | TSALTQCPK  |
| R66M_07MAR06_3A5 | VSPDIPHY   | CAPAGAYLK  | CNNKTFMG   |
| R66M_07MAR06_3A9 | PCNNVSTQC  | THGKPVVST  | QLLINGSLAE |
| R66M_07MAR06_3B6 | KEIIRSEN   | TNKTIIVH   | LNTSVELNCT |
| R66M_07MAR06_3C5 |            |            |            |
| R66M_07MAR06_3D2 |            |            |            |
| R66M_07MAR06_3D6 |            |            |            |
| R66M_07MAR06_3G5 |            |            |            |
| R66M_09AUD06_08  |            |            |            |
| R66M_09AUD06_05  |            |            |            |

|                  | V3         | V4         | V5         |
|------------------|------------|------------|------------|
| R66M_07MAR06_D7  | RPNNTRQSI  | RIGPGYTFA  | TGDIIGDIRQ |
| R66M_07MAR06_D8  | AHCNIS     | IAAM       | IQTGLKVRK  |
| R66M_07MAR06_D9  | LKEHFPNTI  | DFAPASGDDP | EITTSFQKNC |
| R66M_07MAR06_N21 | GEFFYCNSO  | LFNSLLNNT  | ESINETSQNE |
| R66M_07MAR06_N22 | TITLPCRQK  | IINMQEVR   | AMVAPPIRGI |
| R66M_07MAR06_020 | ITCKENIPL  | LITROGNEK  | NNSEANTEE  |
| R66M_07MAR06_3A3 | FRRGGNMD   | MNS        | ELYYK      |
| R66M_07MAR06_3A5 | VVRPELGA   | PTAKERVVE  | REKRAVIGA  |
| R66M_07MAR06_3A9 | VFIGPLAAG  | STMGASVTL  | TVARQLLGG  |
| R66M_07MAR06_3B6 | IVQOQSLLR  | AIEAQSLLK  | LTVWIKOGL  |
| R66M_07MAR06_3C5 | ARVLAVERYL | KQQLLGW    |            |
| R66M_07MAR06_3D2 |            |            |            |
| R66M_07MAR06_3D6 |            |            |            |
| R66M_07MAR06_3G5 |            |            |            |
| R66M_09AUD06_08  |            |            |            |
| R66M_09AUD06_05  |            |            |            |

|                  | V1         | V2        | V3        | V4        | V5         |
|------------------|------------|-----------|-----------|-----------|------------|
| R66M_07MAR06_D7  | CSSKLCITTT | VFWNSWNSK | SQBEIWSMT | NLQWRISN  | YELIISLIE  |
| R66M_07MAR06_D8  | ESQMQEINE  | RDALLADWA | NLWNNFDM  | WMLWIKIFV | IVUGLIGLAI |
| R66M_07MAR06_D9  | VFWLSIINR  | VQVQSPWSL | QTLNPNRDL | DRPCRIEBS | EQQRNSIS   |
| R66M_07MAR06_N21 | IVSGFLAAM  | DLRSCLFS  | HRELDLILL | AAPVWELQ  | RQBHALFVIG |
| R66M_07MAR06_N22 | NLAQVWLEL  | NSAISLFTY | IUAVAGWPT | RVIEWQSGF | RALLHFPR   |
| R66M_07MAR06_020 | RQLEBALL   |           |           |           |            |
| R66M_07MAR06_3A3 |            |           |           |           |            |
| R66M_07MAR06_3A5 |            |           |           |           |            |
| R66M_07MAR06_3A9 |            |           |           |           |            |
| R66M_07MAR06_3B6 |            |           |           |           |            |
| R66M_07MAR06_3C5 |            |           |           |           |            |
| R66M_07MAR06_3D2 |            |           |           |           |            |
| R66M_07MAR06_3D6 |            |           |           |           |            |
| R66M_07MAR06_3G5 |            |           |           |           |            |
| R66M_09AUD06_08  |            |           |           |           |            |
| R66M_09AUD06_05  |            |           |           |           |            |
